# Supplementary material for: The Admixture Structure and Genetic Variation of the Archipelago of Cape Verde and Its Implications for Admixture Mapping Studies
Source: PubMed Central journal article supplement (PMC3511383; doi:10.1371/journal.pone.0051103), 2012-11-30

Figure S1

### Boa Vista

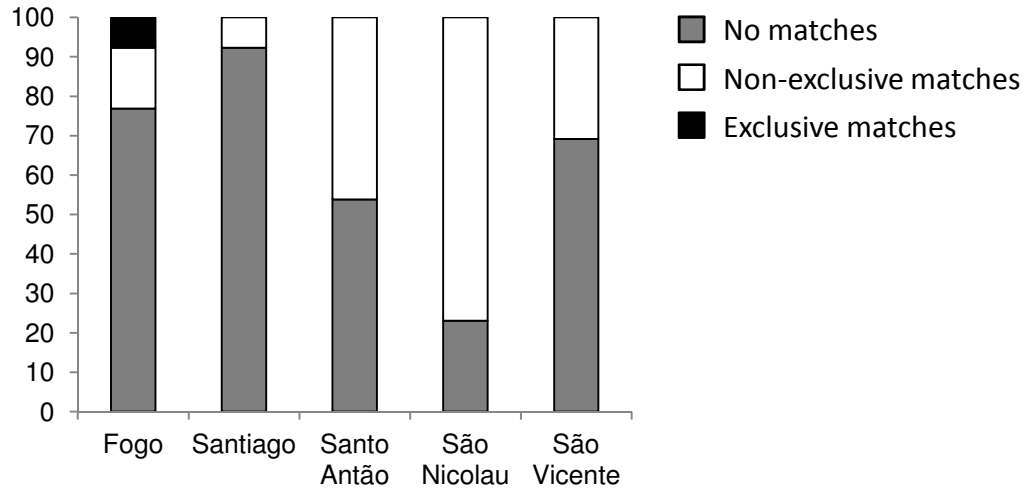

### Santo Antão

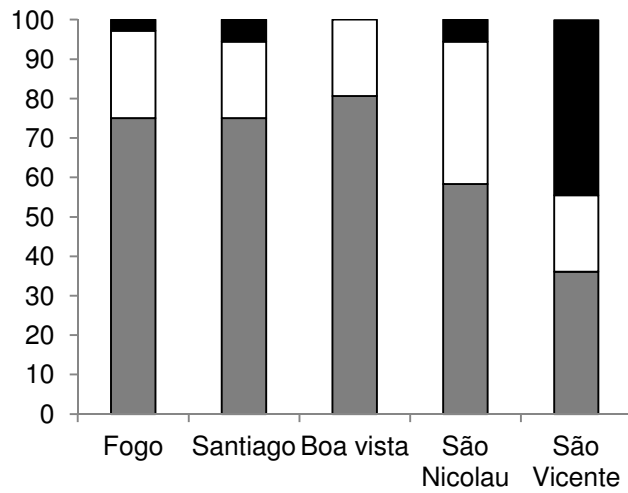

### São Vicente

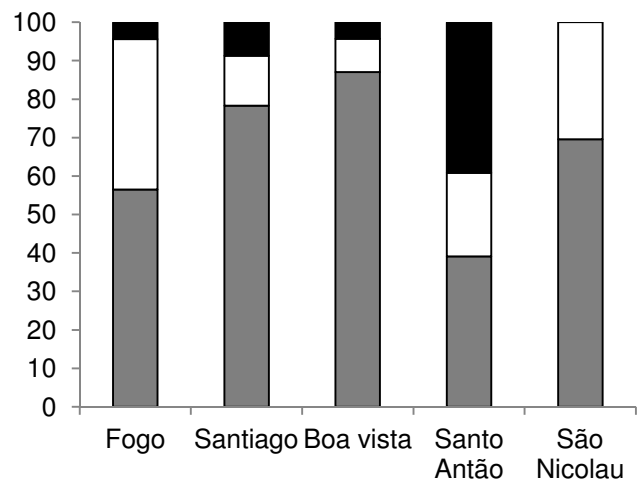

## São Nicolau

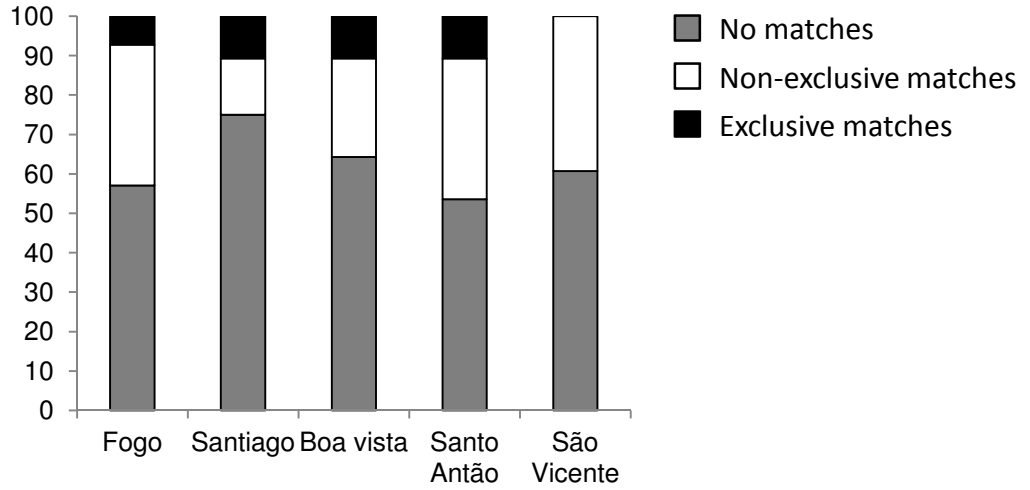

## Fogo

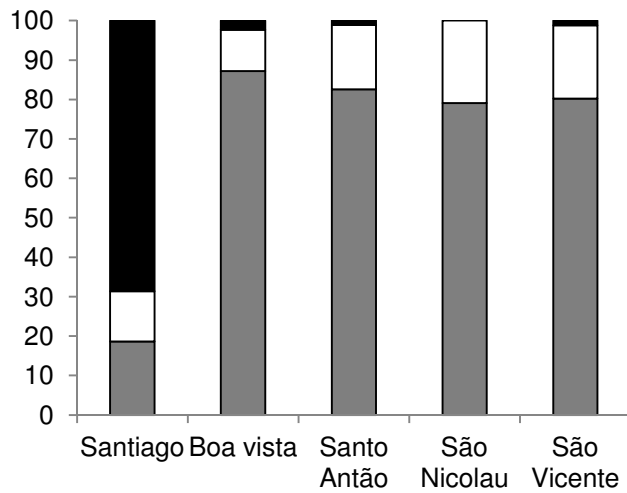

## Santiago

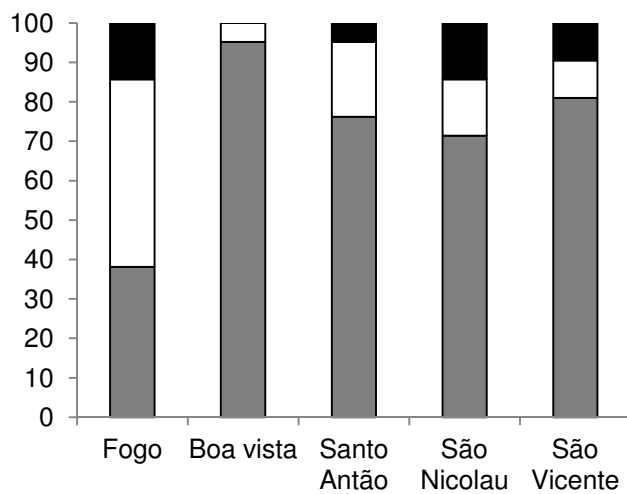

Supplement: pone.0051103.s001.pdf [file pone.0051103.s001.pdf]
